# Supplementary material for: Klebsiella pneumoniae Lipopolysaccharides Serotype O2afg Induce Poor Inflammatory Immune Responses Ex Vivo
Source: MDPI journal article supplement (doi:10.3390/microorganisms9061317), 2021-06-17
Supplement: s1 [file s1]

Table S1

| <b>Mono 48hr</b> | <b>EGF</b> | <b>SEM</b> | <b>Eotaxin</b> | <b>SEM</b> | <b>FGF-2</b> | <b>SEM</b> | <b>G-CSF</b> | <b>SEM</b> | <b>GM-CSF</b> | <b>SEM</b> | <b>HGF</b> | <b>SEM</b> |
|------------------|------------|------------|----------------|------------|--------------|------------|--------------|------------|---------------|------------|------------|------------|
| NS               | <=0        | <=0        | <=0            | <=0        | <=0          | <=0        | <=0          | <=0        | <=0           | <=0        | <=0        | <=0        |
| KPO1             | <=0        | <=0        | <=0            | <=0        | <=0          | <=0        | <=0          | <=0        | <=0           | <=0        | <=0        | <=0        |
| KPO2             | <=0        | <=0        | <=0            | <=0        | <=0          | <=0        | <=0          | <=0        | <=0           | <=0        | <=0        | <=0        |
| ST258            | <=0        | <=0        | <=0            | <=0        | <=0          | <=0        | <=0          | <=0        | <=0           | <=0        | <=0        | <=0        |
| 6613             | <=0        | <=0        | <=0            | <=0        | <=0          | <=0        | <=0          | <=0        | <=0           | <=0        | <=0        | <=0        |

Table S2

| <b>Mono 6hr</b> | <b>EGF</b> | <b>SEM</b> | <b>Eotaxin</b> | <b>SEM</b> | <b>FGF-2</b> | <b>SEM</b> | <b>G-CSF</b> | <b>SEM</b> | <b>GM-CSF</b> | <b>SEM</b> | <b>HGF</b> | <b>SEM</b> |
|-----------------|------------|------------|----------------|------------|--------------|------------|--------------|------------|---------------|------------|------------|------------|
| NS              | 0.33       | 0.2        | <=0            | <=0        | <=0          | <=0        | 3.76         | 0.17       | 0.28          | 0.1        | <=0        | <=0        |
| NS + PMB        | 0.33       | 0.2        | 0.54           | 0.13       | <=0          | <=0        | 3.76         | 0.19       | 0.35          | 0.12       | <=0        | <=0        |
| LPS             | 0.47       | 0.18       | <=0            | <=0        | <=0          | <=0        | 3.76         | 0.17       | 1.55          | 0.88       | <=0        | <=0        |
| KPO1            | 0.61       | 0.21       | <=0            | <=0        | <=0          | <=0        | 3.76         | 0.15       | 0.36          | 0.12       | <=0        | <=0        |
| KPO2            | 0.06       | 0.08       | <=0            | <=0        | <=0          | <=0        | 3.76         | 0.17       | 0.47          | 0.22       | <=0        | <=0        |
| ST258           | <=0        | <=0        | <=0            | <=0        | <=0          | <=0        | 6.35         | 2.1        | 0.77          | 0.12       | <=0        | <=0        |
| 6613            | <=0        | <=0        | <=0            | <=0        | <=0          | <=0        | 1.38         | 0.5        | 0.7           | 0.33       | <=0        | <=0        |
| LPS + PMB       | 0.33       | 0.16       | 1.45           | 0.77       | <=0          | <=0        | 4.37         | 0.2        | 0.32          | 0.12       | <=0        | <=0        |
| KPO1 + PMB      | 0.75       | 0.11       | 0.95           | 0.64       | <=0          | <=0        | 5.05         | 2.1        | 0.33          | 0.12       | <=0        | <=0        |
| KPO2 + PMB      | 0.2        | 0.01       | 0.33           | 0.1        | <=0          | <=0        | 1.38         | 0.5        | 0.32          | 0.12       | <=0        | <=0        |
| ST258 + PMB     | <=0        | <=0        | <=0            | <=0        | <=0          | <=0        | 1.38         | 0.5        | 0.32          | 0.12       | <=0        | <=0        |
| 6613 + PMB      | 0.61       | 0.23       | <=0            | <=0        | <=0          | <=0        | 2.67         | 0.5        | 0.39          | 0.12       | <=0        | <=0        |

Table S3

| <b>WB 6hr</b> | <b>EGF</b> | <b>SEM</b> | <b>Eotaxin</b> | <b>SEM</b> | <b>FGF-2</b> | <b>SEM</b> | <b>G-CSF</b> | <b>SEM</b> | <b>GM-CSF</b> | <b>SEM</b> | <b>HGF</b> | <b>SEM</b> |
|---------------|------------|------------|----------------|------------|--------------|------------|--------------|------------|---------------|------------|------------|------------|
| NS            | 1.19       | 0.6        | 0.33           | 0.31       | <=0          | <=0        | 1.38         | 0.55       | 0.32          | 0.12       | <=0        | <=0        |
| NS + PMB      | 1.62       | 0.34       | <=0            | <=0        | <=0          | <=0        | 1.48         | 0.32       | 0.12          | 0.32       | <=0        | <=0        |
| LPS           | 0.98       | 0.5        | 1.35           | 0.37       | <=0          | <=0        | 3.96         | 0.43       | 0.35          | 0.33       | <=0        | <=0        |
| KPO1          | 1.5        | 0.2        | 0.95           | 0.23       | <=0          | <=0        | 3.36         | 0.67       | 0.34          | 0.16       | <=0        | <=0        |
| KPO2          | 2.35       | 2.1        | <=0            | <=0        | <=0          | <=0        | <=0          | <=0        | 0.3           | 0.01       | <=0        | <=0        |
| ST258         | 2.36       | 0.5        | <=0            | <=0        | <=0          | <=0        | 2.67         | 0.4        | 0.28          | 0.39       | <=0        | <=0        |
| 6613          | 3.11       | 0.5        | <=0            | <=0        | <=0          | <=0        | 1.38         | 0.45       | 0.42          | 0.1        | <=0        | <=0        |
| LPS + PMB     | 1.03       | 0.45       | <=0            | <=0        | <=0          | <=0        | 1.16         | 1.2        | 0.32          | 0.32       | <=0        | <=0        |
| KPO1 + PMB    | 2.84       | 0.17       | <=0            | <=0        | <=0          | <=0        | 3.06         | 2.1        | 0.34          | 0.26       | <=0        | <=0        |
| KPO2 + PMB    | 3.93       | 0.18       | <=0            | <=0        | <=0          | <=0        | 3.76         | 1.28       | 0.28          | 0.11       | <=0        | <=0        |
| ST258 + PMB   | 2.57       | 0.37       | <=0            | <=0        | <=0          | <=0        | 3.95         | 2.3        | 0.39          | 0.21       | <=0        | <=0        |
| 6613 + PMB    | 2.67       | 2.1        | <=0            | <=0        | <=0          | <=0        | 4.05         | 1.77       | 0.35          | 0.15       | <=0        | <=0        |

| IFN alpha | SEM | IFN gamma | SEM | IL-1 beta | SEM  | IL-10 | SEM | IL-12p40 | SEM  | IL-13 | SEM |
|-----------|-----|-----------|-----|-----------|------|-------|-----|----------|------|-------|-----|
| <=0       | <=0 | <=0       | <=0 | <=0       | <=0  | <=0   | <=0 | <=0      | <=0  | <=0   | <=0 |
| <=0       | <=0 | <=0       | <=0 | 30.59     | 1.33 | 44.14 | <=0 | 34.19    | 0.27 | <=0   | <=0 |
| <=0       | <=0 | <=0       | <=0 | <=0       | <=0  | <=0   | <=0 | <=0      | <=0  | <=0   | <=0 |
| <=0       | <=0 | <=0       | <=0 | <=0       | <=0  | <=0   | <=0 | <=0      | <=0  | <=0   | <=0 |
| <=0       | <=0 | <=0       | <=0 | <=0       | <=0  | <=0   | <=0 | 25.21    | 0.33 | <=0   | <=0 |

| IFN alpha | SEM | IFN gamma | SEM | IL-1 beta | SEM | IL-10 | SEM | IL-12p40 | SEM  | IL-13 | SEM  |
|-----------|-----|-----------|-----|-----------|-----|-------|-----|----------|------|-------|------|
| <=0       | <=0 | <=0       | <=0 | <=0       | <=0 | <=0   | <=0 | 1.37     | 0.22 | 0.26  | 0.11 |
| <=0       | <=0 | 0.01      | <=0 | <=0       | <=0 | <=0   | <=0 | 0.65     | 0.45 | 0.26  | 0.11 |
| <=0       | <=0 | <=0       | <=0 | <=0       | <=0 | <=0   | <=0 | 5.55     | 0.66 | <=0   | <=0  |
| <=0       | <=0 | <=0       | <=0 | <=0       | <=0 | <=0   | <=0 | 1.83     | 0.67 | <=0   | <=0  |
| <=0       | <=0 | <=0       | <=0 | <=0       | <=0 | <=0   | <=0 | 1.83     | 0.77 | <=0   | <=0  |
| <=0       | <=0 | <=0       | <=0 | <=0       | <=0 | <=0   | <=0 | 2.29     | 0.11 | <=0   | <=0  |
| <=0       | <=0 | <=0       | <=0 | <=0       | <=0 | <=0   | <=0 | 1.37     | 0.45 | <=0   | <=0  |
| <=0       | <=0 | <=0       | <=0 | <=0       | <=0 | <=0   | <=0 | 1.02     | 0.64 | <=0   | <=0  |
| <=0       | <=0 | <=0       | <=0 | <=0       | <=0 | <=0   | <=0 | 1.37     | 0.16 | <=0   | <=0  |
| <=0       | <=0 | <=0       | <=0 | <=0       | <=0 | <=0   | <=0 | <=0      | <=0  | <=0   | <=0  |
| <=0       | <=0 | <=0       | <=0 | <=0       | <=0 | <=0   | <=0 | 0.66     | 0.21 | <=0   | <=0  |
| <=0       | <=0 | <=0       | <=0 | <=0       | <=0 | <=0   | <=0 | 1.02     | 0.43 | <=0   | <=0  |

| IFN alpha | SEM  | IFN gamma | SEM | IL-1 beta | SEM   | IL-10 | SEM  | IL-12p40 | SEM   | IL-13 | SEM |
|-----------|------|-----------|-----|-----------|-------|-------|------|----------|-------|-------|-----|
| 0.4       | 0.33 | <=0       | <=0 | <=0       | <=0   | <=0   | <=0  | 2.64     | 0.175 | <=0   | <=0 |
| 1.79      | 0.12 | 0.01      | <=0 | <=0       | <=0   | 1.12  | 0.6  | <=0      | 0     | <=0   | <=0 |
| 2.23      | 0.37 | <=0       | <=0 | 28.58     | 1.18  | 0.02  | <=0  | 58.8     | 2.25  | <=0   | <=0 |
| 3.17      | 0.23 | <=0       | <=0 | 10.41     | 0.515 | 2.38  | 0.7  | 40.8     | 0.8   | <=0   | <=0 |
| 0.83      | 0.32 | <=0       | <=0 | 29.73     | 0.37  | 0.55  | 0.22 | 10.76    | 0.495 | <=0   | <=0 |
| 0.4       | 0.36 | <=0       | <=0 | 22.55     | 0.535 | <=0   | <=0  | 4.08     | 0.14  | <=0   | <=0 |
| 0.83      | 0.47 | <=0       | <=0 | 31.96     | 1.56  | <=0   | <=0  | 8.2      | 0.35  | <=0   | <=0 |
| 0.83      | 0.28 | <=0       | <=0 | 18.33     | 0.63  | 1.12  | 0.31 | 14.96    | 1.83  | <=0   | <=0 |
| 0.83      | 0.77 | <=0       | <=0 | 8.265     | 0.175 | <=0   | <=0  | 4.72     | 0.483 | <=0   | <=0 |
| 0.4       | 0.32 | <=0       | <=0 | 4.99      | 0.21  | <=0   | <=0  | 2.64     | 0.315 | <=0   | <=0 |
| 2.66      | 0.31 | <=0       | <=0 | 32.53     | 1.23  | <=0   | <=0  | 18.68    | 1.09  | <=0   | <=0 |
| 0.83      | 0.34 | <=0       | <=0 | 38.04     | 1.24  | <=0   | <=0  | 22.2     | 0.45  | <=0   | <=0 |

| IL-15 | SEM  | IL-17A | SEM | IL-1RA | SEM | IL-2 | SEM | IL-2R | SEM | IL-4 | SEM | IL-5 |
|-------|------|--------|-----|--------|-----|------|-----|-------|-----|------|-----|------|
| 18.92 | 1.03 | <=0    | <=0 | <=0    | <=0 | <=0  | <=0 | <=0   | <=0 | <=0  | <=0 | <=0  |
| <=0   | <=0  | <=0    | <=0 | <=0    | <=0 | <=0  | <=0 | <=0   | <=0 | <=0  | <=0 | <=0  |
| <=0   | <=0  | <=0    | <=0 | <=0    | <=0 | <=0  | <=0 | <=0   | <=0 | <=0  | <=0 | <=0  |
| <=0   | <=0  | <=0    | <=0 | <=0    | <=0 | <=0  | <=0 | <=0   | <=0 | <=0  | <=0 | <=0  |
| <=0   | <=0  | <=0    | <=0 | <=0    | <=0 | <=0  | <=0 | <=0   | <=0 | <=0  | <=0 | <=0  |

| IL-15 | SEM  | IL-17A | SEM | IL-1RA | SEM | IL-2 | SEM | IL-2R | SEM | IL-4 | SEM | IL-5 |
|-------|------|--------|-----|--------|-----|------|-----|-------|-----|------|-----|------|
| 4.18  | 0.55 | <=0    | <=0 | <=0    | <=0 | <=0  | <=0 | <=0   | <=0 | <=0  | <=0 | <=0  |
| 1.66  | 0.32 | <=0    | <=0 | <=0    | <=0 | <=0  | <=0 | <=0   | <=0 | <=0  | <=0 | <=0  |
| 6.9   | 0.43 | <=0    | <=0 | <=0    | <=0 | <=0  | <=0 | 1.64  | <=0 | <=0  | <=0 | <=0  |
| 5.73  | 0.67 | <=0    | <=0 | <=0    | <=0 | <=0  | <=0 | <=0   | <=0 | <=0  | <=0 | <=0  |
| 6.73  | 0.45 | <=0    | <=0 | <=0    | <=0 | <=0  | <=0 | 0.72  | <=0 | <=0  | <=0 | <=0  |
| 5.67  | 0.33 | <=0    | <=0 | 0.3    | <=0 | <=0  | <=0 | <=0   | <=0 | <=0  | <=0 | <=0  |
| 3.17  | 0.12 | <=0    | <=0 | <=0    | <=0 | <=0  | <=0 | <=0   | <=0 | <=0  | <=0 | <=0  |
| 3.4   | 1.2  | <=0    | <=0 | <=0    | <=0 | <=0  | <=0 | <=0   | <=0 | <=0  | <=0 | <=0  |
| 6.09  | 2.1  | <=0    | <=0 | <=0    | <=0 | <=0  | <=0 | <=0   | <=0 | <=0  | <=0 | <=0  |
| 4.47  | 1.28 | <=0    | <=0 | <=0    | <=0 | <=0  | <=0 | <=0   | <=0 | <=0  | <=0 | <=0  |
| 4.34  | 2.3  | <=0    | <=0 | <=0    | <=0 | <=0  | <=0 | <=0   | <=0 | <=0  | <=0 | <=0  |
| 4.01  | 1.77 | <=0    | <=0 | <=0    | <=0 | <=0  | <=0 | <=0   | <=0 | <=0  | <=0 | <=0  |

| IL-15 | SEM  | IL-17A | SEM | IL-1RA | SEM  | IL-2 | SEM | IL-2R | SEM  | IL-4 | SEM | IL-5 |
|-------|------|--------|-----|--------|------|------|-----|-------|------|------|-----|------|
| 1.17  | 1.02 | <=0    | <=0 | <=0    | <=0  | <=0  | <=0 | <=0   | <=0  | <=0  | <=0 | <=0  |
| 1.17  | 2.05 | <=0    | <=0 | <=0    | <=0  | <=0  | <=0 | <=0   | <=0  | <=0  | <=0 | <=0  |
| 2.79  | 1.12 | <=0    | <=0 | 10.4   | 2.64 | <=0  | <=0 | 2.11  | 2.11 | <=0  | <=0 | <=0  |
| 5.32  | 3.74 | <=0    | <=0 | <=0    | <=0  | <=0  | <=0 | 6.35  | 1.33 | <=0  | <=0 | <=0  |
| 2.54  | 1.18 | <=0    | <=0 | <=0    | <=0  | <=0  | <=0 | 1.43  | 0.98 | <=0  | <=0 | <=0  |
| 3.95  | 0.66 | <=0    | <=0 | 5.32   | 1.22 | <=0  | <=0 | 0.72  | 0.55 | <=0  | <=0 | <=0  |
| 3.57  | 1.31 | <=0    | <=0 | <=0    | <=0  | <=0  | <=0 | 2.11  | 1.22 | <=0  | <=0 | <=0  |
| 4.75  | 2.54 | <=0    | <=0 | <=0    | <=0  | <=0  | <=0 | 0.72  | 0.43 | <=0  | <=0 | <=0  |
| 2.84  | 0.91 | <=0    | <=0 | <=0    | <=0  | <=0  | <=0 | <=0   | <=0  | <=0  | <=0 | <=0  |
| 1.99  | 1.95 | <=0    | <=0 | <=0    | <=0  | <=0  | <=0 | <=0   | <=0  | <=0  | <=0 | <=0  |
| 13.89 | 1.53 | <=0    | <=0 | 2.98   | 1.02 | <=0  | <=0 | 10.22 | 2.88 | <=0  | <=0 | <=0  |
| 5.27  | 0.99 | <=0    | <=0 | 5.74   | 0.45 | <=0  | <=0 | 4.02  | 1.21 | <=0  | <=0 | <=0  |

| SEM | IL-6    | SEM  | IL-7 | SEM | IL-8     | SEM | IP-10 | SEM | MCP-1   | SEM  | MIG  | SEM  |
|-----|---------|------|------|-----|----------|-----|-------|-----|---------|------|------|------|
| <=0 | 16.07   | <=0  | <=0  | <=0 | 21063.49 | <=0 | <=0   | <=0 | 132.68  | 1.2  | 3.73 | 1.02 |
| <=0 | 18099.6 | 5.7  | <=0  | <=0 | 21063.49 | <=0 | 5.48  | 1.2 | 3995.78 | 1.96 | <=0  | <=0  |
| <=0 | <=0     | <=0  | <=0  | <=0 | 21063.49 | <=0 | <=0   | <=0 | 6.64    | 0.6  | <=0  | <=0  |
| <=0 | <=0     | <=0  | <=0  | <=0 | 21063.49 | <=0 | <=0   | <=0 | <=0     | <=0  | <=0  | <=0  |
| <=0 | 325.21  | 3.21 | <=0  | <=0 | 21063.49 | <=0 | <=0   | <=0 | 837.01  | 1.79 | <=0  | <=0  |

| SEM | IL-6    | SEM  | IL-7 | SEM | IL-8    | SEM | IP-10 | SEM | MCP-1   | SEM  | MIG | SEM |
|-----|---------|------|------|-----|---------|-----|-------|-----|---------|------|-----|-----|
| <=0 | <=0     | <=0  | <=0  | <=0 | 1070.24 | <=0 | <=0   | <=0 | 267.29  | 1.67 | <=0 | <=0 |
| <=0 | 0.91    | 0.22 | <=0  | <=0 | 1070.24 | <=0 | <=0   | <=0 | 119.61  | 0.76 | <=0 | <=0 |
| <=0 | 7427.79 | 2.56 | <=0  | <=0 | 1070.24 | <=0 | <=0   | <=0 | 871.98  | 0.99 | <=0 | <=0 |
| <=0 | 57.91   | 1.08 | <=0  | <=0 | 1070.24 | <=0 | <=0   | <=0 | 684.18  | 0.69 | <=0 | <=0 |
| <=0 | 455.13  | 1.34 | <=0  | <=0 | 1070.24 | <=0 | <=0   | <=0 | 4529.06 | 1.57 | <=0 | <=0 |
| <=0 | 1316.74 | 5.6  | <=0  | <=0 | 1070.24 | <=0 | <=0   | <=0 | 6630.12 | 1.67 | <=0 | <=0 |
| <=0 | 162.09  | 3.2  | <=0  | <=0 | 1070.24 | <=0 | <=0   | <=0 | 65.26   | 0.42 | <=0 | <=0 |
| <=0 | <=0     | <=0  | <=0  | <=0 | 1070.24 | <=0 | <=0   | <=0 | <=0     | <=0  | <=0 | <=0 |
| <=0 | <=0     | <=0  | <=0  | <=0 | 1070.24 | <=0 | <=0   | <=0 | <=0     | <=0  | <=0 | <=0 |
| <=0 | <=0     | <=0  | <=0  | <=0 | 1070.24 | <=0 | <=0   | <=0 | <=0     | <=0  | <=0 | <=0 |
| <=0 | <=0     | <=0  | <=0  | <=0 | 1070.24 | <=0 | <=0   | <=0 | <=0     | <=0  | <=0 | <=0 |
| <=0 | 0.62    | 0.32 | <=0  | <=0 | 1070.24 | <=0 | <=0   | <=0 | <=0     | <=0  | <=0 | <=0 |

| SEM | IL-6   | SEM    | IL-7 | SEM | IL-8    | SEM  | IP-10 | SEM | MCP-1 | SEM   | MIG | SEM |
|-----|--------|--------|------|-----|---------|------|-------|-----|-------|-------|-----|-----|
| <=0 | <=0    | <=0    | <=0  | <=0 | <=0     | <=0  | <=0   | <=0 | 5.09  | 0.79  | <=0 | <=0 |
| <=0 | <=0    | <=0    | <=0  | <=0 | 564.41  | 1.43 | <=0   | <=0 | <=0   | <=0   | <=0 | <=0 |
| <=0 | 7.537  | 0.15   | <=0  | <=0 | 1070.24 | <=0  | <=0   | <=0 | 436.8 | 28.01 | <=0 | <=0 |
| <=0 | 1.427  | 0.1    | <=0  | <=0 | 1070.24 | <=0  | <=0   | <=0 | 619.1 | 19.23 | <=0 | <=0 |
| <=0 | 24.54  | 2.9    | <=0  | <=0 | 1070.24 | <=0  | <=0   | <=0 | 826.4 | 19.09 | <=0 | <=0 |
| <=0 | 1.474  | 0.14   | <=0  | <=0 | 1070.24 | <=0  | <=0   | <=0 | 1012  | 13.77 | <=0 | <=0 |
| <=0 | 3.659  | 0.55   | <=0  | <=0 | <=0     | <=0  | <=0   | <=0 | 360.1 | 12.59 | <=0 | <=0 |
| <=0 | 2.437  | 0.29   | <=0  | <=0 | 686.21  | 2.3  | <=0   | <=0 | 218.6 | 16.07 | <=0 | <=0 |
| <=0 | 0.6466 | 0.049  | <=0  | <=0 | 1070.24 | <=0  | <=0   | <=0 | 333.2 | 25.65 | <=0 | <=0 |
| <=0 | 0.2012 | 0.0015 | <=0  | <=0 | 619.31  | 1.23 | <=0   | <=0 | 41.66 | 1.66  | <=0 | <=0 |
| <=0 | 5.675  | 0.515  | <=0  | <=0 | 1070.24 | <=0  | <=0   | <=0 | 517.7 | 15.08 | <=0 | <=0 |
| <=0 | 25.26  | 2.53   | <=0  | <=0 | 1070.24 | <=0  | <=0   | <=0 | 349.5 | 15.17 | <=0 | <=0 |

| MIP-1 alpha | SEM  | MIP-1 beta | SEM  | RANTES | SEM  | TNF alpha | SEM  | VEGF-A | SEM  |
|-------------|------|------------|------|--------|------|-----------|------|--------|------|
| 27.08       | 0.1  | 38.04      | 1.98 | <=0    | <=0  | 2.8       | 0.44 | 2.38   | 1.87 |
| 11739.8     | 0.12 | 865.41     | 0.88 | 18.46  | 1.67 | 216.51    | 1.87 | 2.53   | 1.02 |
| 9.47        | 0.88 | <=0        | <=0  | <=0    | <=0  | 0.7       | 0.15 | 0.6    | 0.76 |
| 10.64       | 0.12 | <=0        | <=0  | <=0    | <=0  | 0.7       | 0.16 | 0.6    | 0.76 |
| 35.27       | 0.22 | <=0        | <=0  | <=0    | <=0  | 58.88     | 1.3  | 0.66   | 0.76 |

| MIP-1 alpha | SEM  | MIP-1 beta | SEM  | RANTES | SEM  | TNF alpha | SEM  | VEGF-A | SEM |
|-------------|------|------------|------|--------|------|-----------|------|--------|-----|
| 3.54        | 0.44 | 7.48       | 0.23 | 4.5    | 0.3  | <=0       | <=0  | <=0    | <=0 |
| 5.79        | 1.01 | 18.61      | 0.78 | 15.57  | 1.3  | <=0       | <=0  | <=0    | <=0 |
| 81707.42    | 1.76 | 1431.96    | 1.34 | 10.93  | 1    | 532.11    | 0.5  | <=0    | <=0 |
| 86.73       | 0.76 | 41.62      | 1.04 | 2.99   | 0.99 | 0.44      | 0.62 | <=0    | <=0 |
| 220.35      | 0.55 | 68.07      | 0.89 | 5.81   | 0.65 | 233.93    | 0.33 | <=0    | <=0 |
| 22111.55    | 1.91 | 1431.96    | 1.99 | 21.34  | 0.34 | 207.38    | 0.34 | <=0    | <=0 |
| 87.62       | 0.94 | 38.15      | 1.07 | 2.47   | 0.27 | 1.88      | 0.11 | <=0    | <=0 |
| 2.32        | 0.77 | <=0        | <=0  | 0.88   | 0.16 | <=0       | <=0  | <=0    | <=0 |
| 3.55        | 0.34 | <=0        | <=0  | 1.37   | 0.55 | <=0       | <=0  | <=0    | <=0 |
| 2.32        | 0.46 | <=0        | <=0  | 1.49   | 0.43 | <=0       | <=0  | <=0    | <=0 |
| 1.09        | 0.29 | <=0        | <=0  | 1.61   | 0.13 | <=0       | <=0  | <=0    | <=0 |
| 3.44        | 1.45 | <=0        | <=0  | 1.61   | 0.22 | <=0       | <=0  | <=0    | <=0 |

| MIP-1 alpha | SEM  | MIP-1 beta | SEM  | RANTES | SEM  | TNF alpha | SEM   | VEGF-A | SEM  |
|-------------|------|------------|------|--------|------|-----------|-------|--------|------|
| 1.27        | 6    | 10         | 1.5  | 816.11 | 6    | <=0       | <=0   | 0.13   | 0.12 |
| 704.96      | 5.5  | 409        | 3.5  | 413.96 | 15.5 | <=0       | <=0   | 0.1    | 0.1  |
| 33.28       | 4.5  | 79.5       | 1.2  | 456.95 | 8.5  | 69.76     | 2.44  | 0.4    | 0.08 |
| 73.15       | 2.75 | 131.25     | 8.5  | 216.58 | 2.75 | 65        | 5     | 0.78   | 0.18 |
| 17.12       | 6.5  | 57         | 9    | 239.49 | 6.5  | 162.8     | 10.16 | 0.29   | 0.29 |
| 35.15       | 7.5  | 87.25      | 10   | 71.73  | 7.5  | <=0       | <=0   | 0.31   | 0.31 |
| 2.32        | 1.6  | 7.5        | 9    | 89.03  | 6    | <=0       | <=0   | 0.15   | 0.11 |
| 579.32      | 12   | 513.75     | 10.5 | 186.25 | 12   | 14.84     | 4.83  | 0.64   | 0.35 |
| 7.91        | 6.25 | 29.5       | 9    | 58.73  | 6.25 | 20.22     | 0.22  | 0.16   | 0.1  |
| 7.91        | 2.9  | 24.75      | 9.5  | 440.99 | 9    | <=0       | <=0   | 0.08   | 0.27 |
| 51.54       | 8    | 116.25     | 6.3  | 816.11 | 8    | <=0       | <=0   | 1      | 0.27 |
| 42.85       | 11.5 | 89.5       | 7.5  | 506.79 | 13.5 | <=0       | <=0   | 0.5    | 0.2  |
