# Supplementary material for: Klebsiella pneumoniae Lipopolysaccharides Serotype O2afg Induce Poor Inflammatory Immune Responses Ex Vivo
Source: MDPI journal article supplement (doi:10.3390/microorganisms9061317), 2021-06-17
Supplement: s1 [file s1]

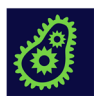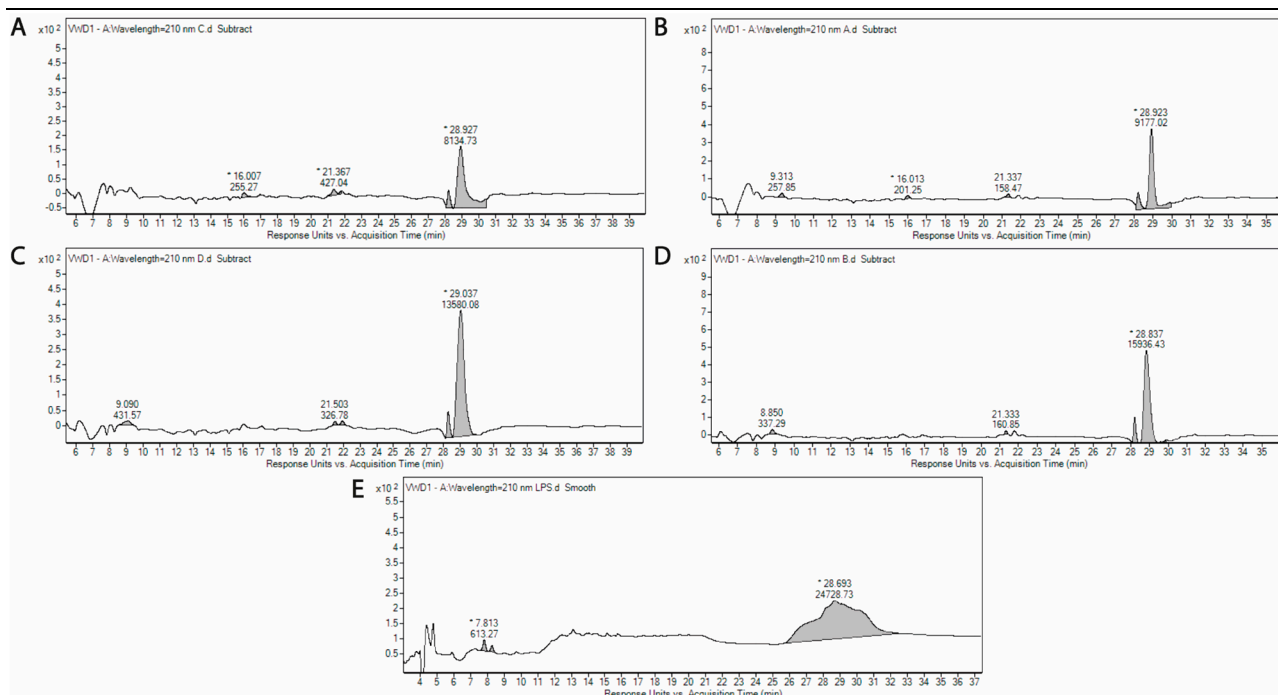

**Figure S1.** The purity of the purified LPS was determined by HPLC, based on the integrated areas of the peaks' ratio (on gray) corresponding to LPS in the chromatograms of (A) *K. pneumoniae* B5055 LPS O1, (B) *K. pneumoniae* C5046 LPS O2a, (C) *K. pneumoniae* 6613 LPS O2afg and (D) *K. pneumoniae* ST258 LPS O2afg. Commercial *K. pneumoniae* LPS O1 (E) was used as control.

**Method.** Briefly, samples were injected (injection volume = 10  $\mu$ l) into a HPLC-UV/Vis system (Agilent 1260 Infinity; Agilent, Santa Clara, CA, USA) equipped with a reversed-phase C18 column (Phenomenex Luna, 150 mm  $\times$  4.6 mm, particle size 3  $\mu$ m; Phenomenex, Torrance, CA, USA) outfitted with a C18 security-guard column (Phenomenex, 4mm  $\times$  3mm). The eluent phase was composed of analytical grade formic acid and HPLC/MS grade water 0.1% v/v (phase A), and analytical grade formic acid - HPLC/MS acetonitrile 0.1% v/v (phase B). Both column and security-guard column were maintained at 30  $^{\circ}$ C and the flow-rate was set to 0.5 mL/min using the following gradient: 0 - 5 min, 5% phase B isocratic; 5 - 15 min, linear gradient from 5% to 15% phase B; 15 - 20 min, 15% phase B isocratic; 20 - 25 min, linear gradient from 15% to 30% phase B; 25 - 35min, 30% phase B isocratic; 35 - 45 min, washing and reconditioning of the column to 5% phase B. The eluate was monitored measuring the absorbance at 210 nm.

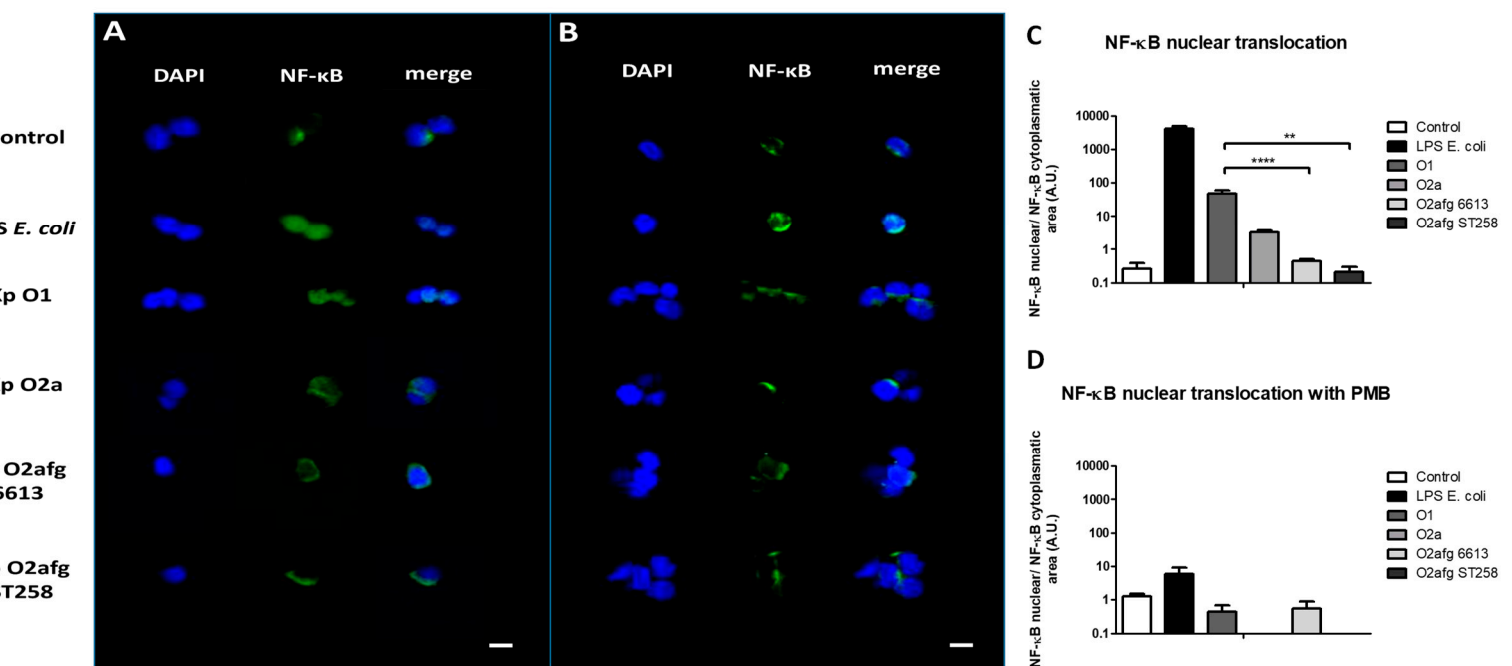

**Figure S2.** Translocation of NF-κB to monocytes' nuclei. (A and C) Stimulation of monocytes for 6 h with 1 μg/ml of each of the *E. coli* LPS and *K. pneumoniae* O1 and O2a LPS induces translocation of NF-κB to the nuclei. Conversely, in monocytes stimulated likewise with *K. pneumoniae* O2afg LPS, nuclear translocation of NF-κB is severely impaired. (B and D) Inhibition of NF-κB nuclear translocation with PMB. Incubation with PMB reduced almost completely NF-κB translocation in cells treated with *E. coli* LPS. Moreover, PMB fully reverted NF-κB nuclear translocation induced by *K. pneumoniae* O1 and O2a-antigen. Results are representative of approximately 10 fields and 40 cells per condition tested. Blue, DAPI; Green, NF-κB. Bar, 10 μm. Statistical analysis was done using the paired Student t-test, \*\*  $p < 0,01$  and \*\*\*\*  $p < 0,0001$ .
